# Supplementary material for: Identifying Suitable Reference Gene Candidates for Quantification of DNA Damage-Induced Cellular Responses in Human U2OS Cell Culture System
Source: MDPI journal article supplement (doi:10.3390/biom13101523), 2023-10-13
Supplement: s1 [file s1]

**A**

| UVB   | Calculated concentration | Mean   | Median | Standard deviation | P-value | Normality |
|-------|--------------------------|--------|--------|--------------------|---------|-----------|
| NT    | 75.503581926333          | 76.339 | 75.339 | 9.35               |         | Passed    |
|       | 90.2721697428242         |        |        |                    |         |           |
|       | 74.1990180075756         |        |        |                    |         |           |
|       | 75.1753062217693         |        |        |                    |         |           |
|       | 64.2614657260696         |        |        |                    |         |           |
|       | 82.0204587583786         |        |        |                    |         |           |
|       | 85.3008460605008         |        |        |                    |         |           |
|       | 63.9820686776209         |        |        |                    |         |           |
| 0.5 h | 67.7109364198647         | 71.964 | 66.981 | 10.254             | 0.388   | Passed    |
|       | 64.2614657260696         |        |        |                    |         |           |
|       | 66.2517070642947         |        |        |                    |         |           |
|       | 64.8239253658498         |        |        |                    |         |           |
|       | 80.9552737763268         |        |        |                    |         |           |
|       | 60.7225616836061         |        |        |                    |         |           |
|       | 84.5607137269933         |        |        |                    |         |           |
|       | 86.4232087669872         |        |        |                    |         |           |
| 2 h   | 74.5230304544622         | 76.334 | 77.563 | 8.443              | 0.999   | Passed    |
|       | 71.0353727161175         |        |        |                    |         |           |
|       | 64.5420828462086         |        |        |                    |         |           |
|       | 66.2517070642947         |        |        |                    |         |           |
|       | 83.4625389094283         |        |        |                    |         |           |
|       | 80.6032951170495         |        |        |                    |         |           |
|       | 83.8270033212439         |        |        |                    |         |           |
|       | 86.4232087669872         |        |        |                    |         |           |
| 6 h   | 87.1796429118128         | 74.529 | 74.686 | 9.391              | 0.705   | Passed    |
|       | 71.6571221533289         |        |        |                    |         |           |
|       | 74.5230304544622         |        |        |                    |         |           |
|       | 74.8484577996664         |        |        |                    |         |           |
|       | 80.6032951170495         |        |        |                    |         |           |
|       | 60.9877251092234         |        |        |                    |         |           |
|       | 83.8270033212439         |        |        |                    |         |           |
|       | 62.6031996531911         |        |        |                    |         |           |

**B**

| NCS | Calculated concentration | Mean   | Median | Standard deviation | P-value | Normality |
|-----|--------------------------|--------|--------|--------------------|---------|-----------|
| NT  | 60.7225616836061         | 66.445 | 63.861 | 10.274             |         | Passed    |
|     | 50.567491422219          |        |        |                    |         |           |
|     | 74.8484577996664         |        |        |                    |         |           |
|     | 73.8764143072884         |        |        |                    |         |           |
|     | 62.3310124410117         |        |        |                    |         |           |
|     | 60.7225616836061         |        |        |                    |         |           |
|     | 65.391308031316          |        |        |                    |         |           |
|     | 83.0996591219251         |        |        |                    |         |           |
| 2 h | 74.8484577996664         | 70.42  | 72.601 | 7.025              | 0.382   | Passed    |
|     | 73.5552132286293         |        |        |                    |         |           |
|     | 72.9169945693451         |        |        |                    |         |           |
|     | 72.2843135604758         |        |        |                    |         |           |
|     | 81.6638488704686         |        |        |                    |         |           |
|     | 62.6031996531911         |        |        |                    |         |           |
|     | 63.4269136002678         |        |        |                    |         |           |
|     | 62.0600086488313         |        |        |                    |         |           |
| 4 h | 72.2843135604758         | 75.497 | 71.352 | 9.252              | 0.0853  | Passed    |
|     | 70.4190180303426         |        |        |                    |         |           |
|     | 69.5044988775332         |        |        |                    |         |           |
|     | 68.3035881510008         |        |        |                    |         |           |
|     | 87.5603391821552         |        |        |                    |         |           |
|     | 86.8006018389216         |        |        |                    |         |           |
|     | 64.5420828462086         |        |        |                    |         |           |
|     | 84.5607137269933         |        |        |                    |         |           |
| 8 h | 73.2354086732571         | 78.569 | 78.714 | 7.84               | 0.0189  | Failed    |
|     | 70.7265239644109         |        |        |                    |         |           |
|     | 72.5999648714656         |        |        |                    |         |           |
|     | 68.9014271693462         |        |        |                    |         |           |
|     | 86.0474565308043         |        |        |                    |         |           |
|     | 86.0474565308043         |        |        |                    |         |           |
|     | 86.8006018389216         |        |        |                    |         |           |
|     | 84.1930592771126         |        |        |                    |         |           |

**C**

| ActD | Calculated concentration | Mean   | Median | Standard deviation | P-value | Normality |
|------|--------------------------|--------|--------|--------------------|---------|-----------|
| NT   | 71.0353727161175         | 82.735 | 72.779 | 21.93              |         | Failed    |
|      | 74.5230304544622         |        |        |                    |         |           |
|      | 68.6018564208813         |        |        |                    |         |           |
|      | 68.6018564208813         |        |        |                    |         |           |
|      | 64.5420828462086         |        |        |                    |         |           |
|      | 79.5565145849448         |        |        |                    |         |           |
|      | 116.227834662543         |        |        |                    |         |           |
|      | 118.787815013076         |        |        |                    |         |           |
| 1 h  | 74.1990180075756         | 82.711 | 77.931 | 15.339             | 0.505   | Failed    |
|      | 72.9169945693451         |        |        |                    |         |           |
|      | 71.0353727161175         |        |        |                    |         |           |
|      | 70.4190180303426         |        |        |                    |         |           |
|      | 84.5607137269933         |        |        |                    |         |           |
|      | 81.6638488704686         |        |        |                    |         |           |
|      | 116.227834662543         |        |        |                    |         |           |
|      | 90.6663704666284         |        |        |                    |         |           |
| 6 h  | 66.2517070642947         | 83.300 | 72.301 | 22.214             | 1.000   | Failed    |
|      | 69.8080112872074         |        |        |                    |         |           |
|      | 73.8764143072884         |        |        |                    |         |           |
|      | 70.7265239644109         |        |        |                    |         |           |
|      | 85.6733379963204         |        |        |                    |         |           |
|      | 64.5420828462086         |        |        |                    |         |           |
|      | 116.735378645153         |        |        |                    |         |           |
|      | 118.787815013076         |        |        |                    |         |           |
| 24 h | 91.8593311187661         | 88.433 | 86.584 | 21.864             | 0.574   | Passed    |
|      | 94.2925487995782         |        |        |                    |         |           |
|      | 70.4190180303426         |        |        |                    |         |           |
|      | 68.6018564208813         |        |        |                    |         |           |
|      | 62.8765754531309         |        |        |                    |         |           |
|      | 81.308789456844          |        |        |                    |         |           |
|      | 117.757125321493         |        |        |                    |         |           |
|      | 120.350789118411         |        |        |                    |         |           |

**Figure S1 The calculated values of 18S rRNA expression obtained from RT-qPCR measurements and the result of statistical test. A) UVB; B) NCS; C) ActD**

|   |       |                          |        |        |                    |         |           |
|---|-------|--------------------------|--------|--------|--------------------|---------|-----------|
| A | UVB   | Calculated concentration | Mean   | Median | Standard deviation | P-value | Normality |
|   | NT    | 87.2159998779462         | 83.179 | 84.027 | 6.706              |         | Passed    |
|   |       | 75.1106689611481         |        |        |                    |         |           |
|   |       | 85.2339056779069         |        |        |                    |         |           |
|   |       | 88.2242654860911         |        |        |                    |         |           |
|   |       | 82.8195128265649         |        |        |                    |         |           |
|   |       | 72.9830337113378         |        |        |                    |         |           |
|   |       | 92.9076646946749         |        |        |                    |         |           |
|   | 0.5 h | 80.9373343701653         | 70.385 | 66.956 | 8.063              | 0.00390 | Failed    |
|   |       | 66.5712656724714         |        |        |                    |         |           |
|   |       | 65.4333240261037         |        |        |                    |         |           |
|   |       | 64.6855232948805         |        |        |                    |         |           |
|   |       | 62.8531977222538         |        |        |                    |         |           |
|   |       | 70.5092751655766         |        |        |                    |         |           |
|   |       | 67.3408666374567         |        |        |                    |         |           |
|   | 2 h   | 84.7454608952117         | 74.747 | 75.98  | 13.403             | 0.134   | Passed    |
|   |       | 80.9373343701653         |        |        |                    |         |           |
|   |       | 93.4431537180767         |        |        |                    |         |           |
|   |       | 90.796220193801          |        |        |                    |         |           |
|   |       | 59.3427873723955         |        |        |                    |         |           |
|   |       | 55.0707098552879         |        |        |                    |         |           |
|   |       | 70.5092751655766         |        |        |                    |         |           |
|   | 6 h   | 75.5435819926106         | 82.097 | 82.008 | 8.649              | 0.784   | Passed    |
|   |       | 76.4169079390632         |        |        |                    |         |           |
|   |       | 76.8573496995804         |        |        |                    |         |           |
|   |       | 90.796220193801          |        |        |                    |         |           |
|   |       | 77.3003300206027         |        |        |                    |         |           |
|   |       | 89.7585611589928         |        |        |                    |         |           |
|   |       | 92.3752443657977         |        |        |                    |         |           |
| B | NCS   | Calculated concentration | Mean   | Median | Standard deviation | P-value | Normality |
|   | NT    | 59.6848195541365         | 85.504 | 92.914 | 15.504             |         | Failed    |
|   |       | 61.4247790968462         |        |        |                    |         |           |
|   |       | 95.6161520283721         |        |        |                    |         |           |
|   |       | 93.9817291229425         |        |        |                    |         |           |
|   |       | 95.6161520283721         |        |        |                    |         |           |
|   |       | 91.8458751458635         |        |        |                    |         |           |
|   |       | 95.0682103351199         |        |        |                    |         |           |
|   | 2 h   | 90.796220193801          | 91.024 | 93.175 | 14.018             | 0.574   | Passed    |
|   |       | 65.8104600449221         |        |        |                    |         |           |
|   |       | 108.503068818176         |        |        |                    |         |           |
|   |       | 83.7769525920115         |        |        |                    |         |           |
|   |       | 96.167251876155          |        |        |                    |         |           |
|   |       | 92.9076646946749         |        |        |                    |         |           |
|   |       | 80.9373343701653         |        |        |                    |         |           |
|   | 4 h   | 93.4431537180767         | 94.302 | 93.722 | 8.289              | 0.442   | Passed    |
|   |       | 106.648362293977         |        |        |                    |         |           |
|   |       | 103.627369163579         |        |        |                    |         |           |
|   |       | 101.856005830111         |        |        |                    |         |           |
|   |       | 82.8195128265649         |        |        |                    |         |           |
|   |       | 88.2242654860911         |        |        |                    |         |           |
|   |       | 92.3752443657977         |        |        |                    |         |           |
|   | 8 h   | 86.2192571714764         | 96.465 | 95.901 | 9.017              | 0.161   | Passed    |
|   |       | 95.0682103351199         |        |        |                    |         |           |
|   |       | 104.224643014918         |        |        |                    |         |           |
|   |       | 94.5234086981534         |        |        |                    |         |           |
|   |       | 81.8730151027667         |        |        |                    |         |           |
|   |       | 93.9817291229425         |        |        |                    |         |           |
|   |       | 97.2789989504558         |        |        |                    |         |           |
| C | ActD  | Calculated concentration | Mean   | Median | Standard deviation | P-value | Normality |
|   | NT    | 73.8267582913712         | 66.814 | 71.949 | 15.792             |         | Passed    |
|   |       | 84.7454608952117         |        |        |                    |         |           |
|   |       | 70.915667286434          |        |        |                    |         |           |
|   |       | 72.9830337113378         |        |        |                    |         |           |
|   |       | 64.3148338829851         |        |        |                    |         |           |
|   |       | 76.8573496995804         |        |        |                    |         |           |
|   |       | 33.2106699060014         |        |        |                    |         |           |
|   | 1 h   | 57.6618037254408         | 82.77  | 84.531 | 16.033             | 0.0646  | Passed    |
|   |       | 99.5411989291117         |        |        |                    |         |           |
|   |       | 106.037198981312         |        |        |                    |         |           |
|   |       | 87.2159998779462         |        |        |                    |         |           |
|   |       | 74.2522712867553         |        |        |                    |         |           |
|   |       | 82.3449040588009         |        |        |                    |         |           |
|   |       | 86.7161964280267         |        |        |                    |         |           |
|   | 6 h   | 69.7034642380163         | 74.209 | 72.371 | 13.682             | 0.334   | Passed    |
|   |       | 56.3513661120679         |        |        |                    |         |           |
|   |       | 94.5234086981534         |        |        |                    |         |           |
|   |       | 88.7327609468341         |        |        |                    |         |           |
|   |       | 65.8104600449221         |        |        |                    |         |           |
|   |       | 70.915667286434          |        |        |                    |         |           |
|   |       | 73.8267582913712         |        |        |                    |         |           |
|   | 24 h  | 82.3449040588009         | 79.842 | 82.100 | 22.802             | 0.205   | Passed    |
|   |       | 64.3148338829851         |        |        |                    |         |           |
|   |       | 53.2040891874697         |        |        |                    |         |           |
|   |       | 99.5411989291117         |        |        |                    |         |           |
|   |       | 109.128444588286         |        |        |                    |         |           |
|   |       | 63.2154627471747         |        |        |                    |         |           |
|   |       | 40.8443140042543         |        |        |                    |         |           |

**Figure S2** The calculated values of *B2M* expression obtained from RT-qPCR measurements and the result of statistical test. A) UVB; B) NCS; C) ActD

|   |       |                          |         |         |                    |         |           |
|---|-------|--------------------------|---------|---------|--------------------|---------|-----------|
| A | UVB   | Calculated concentration | Mean    | Median  | Standard deviation | P-value | Normality |
|   | NT    | 101.157748089812         | 102.057 | 101.426 | 11.217             | 0.412   | Passed    |
|   |       | 101.693256000083         |         |         |                    |         |           |
|   |       | 120.411551140436         |         |         |                    |         |           |
|   |       | 100.095177235046         |         |         |                    |         |           |
|   |       | 80.1875888935223         |         |         |                    |         |           |
|   |       | 100.095177235046         |         |         |                    |         |           |
|   |       | 109.49496572516          |         |         |                    |         |           |
|   | 0.5 h | 103.316849038732         | 97.193  | 95.45   | 11.769             | 0.412   | Passed    |
|   |       | 91.9867243219053         |         |         |                    |         |           |
|   |       | 95.4500484956238         |         |         |                    |         |           |
|   |       | 95.4500484956238         |         |         |                    |         |           |
|   |       | 83.6471512193183         |         |         |                    |         |           |
|   |       | 84.0899617009217         |         |         |                    |         |           |
|   |       | 101.693256000083         |         |         |                    |         |           |
|   | 2 h   | 106.080645147206         | 95.54   | 102.796 | 15.913             | 0.360   | Passed    |
|   |       | 119.146736460048         |         |         |                    |         |           |
|   |       | 113.617479756308         |         |         |                    |         |           |
|   |       | 108.918374684741         |         |         |                    |         |           |
|   |       | 74.4740815376555         |         |         |                    |         |           |
|   |       | 77.6871439366018         |         |         |                    |         |           |
|   |       | 100.625060117984         |         |         |                    |         |           |
|   | 6 h   | 78.5118399630966         | 106.072 | 104.693 | 5.719              | 0.382   | Passed    |
|   |       | 105.522033624305         |         |         |                    |         |           |
|   |       | 104.966363701477         |         |         |                    |         |           |
|   |       | 107.774285451105         |         |         |                    |         |           |
|   |       | 103.863786776762         |         |         |                    |         |           |
|   |       | 117.274381527681         |         |         |                    |         |           |
|   |       | 110.074609117662         |         |         |                    |         |           |
| B | NCS   | Calculated concentration | Mean    | Median  | Standard deviation | P-value | Normality |
|   | NT    | 64.579422551823          | 79.71   | 81.731  | 10.923             | 0.582   | Passed    |
|   |       | 64.9212924754845         |         |         |                    |         |           |
|   |       | 89.1183534916045         |         |         |                    |         |           |
|   |       | 85.8847695088408         |         |         |                    |         |           |
|   |       | 75.264668963177          |         |         |                    |         |           |
|   |       | 78.92746511835476        |         |         |                    |         |           |
|   |       | 94.4474318742317         |         |         |                    |         |           |
|   | 2 h   | 84.5351163283779         | 82.204  | 82.334  | 6.100              | 0.582   | Passed    |
|   |       | 92.4736827550899         |         |         |                    |         |           |
|   |       | 87.7178855167187         |         |         |                    |         |           |
|   |       | 75.264668963177          |         |         |                    |         |           |
|   |       | 73.6917985195805         |         |         |                    |         |           |
|   |       | 81.8991048430262         |         |         |                    |         |           |
|   |       | 80.6120851774837         |         |         |                    |         |           |
|   | 4 h   | 82.7685133823933         | 91.27   | 92.033  | 10.688             | 0.0505  | Passed    |
|   |       | 83.2066725394979         |         |         |                    |         |           |
|   |       | 76.4663139629669         |         |         |                    |         |           |
|   |       | 81.0388286557751         |         |         |                    |         |           |
|   |       | 95.4500484956238         |         |         |                    |         |           |
|   |       | 83.2066725394979         |         |         |                    |         |           |
|   |       | 104.966363701477         |         |         |                    |         |           |
|   | 8 h   | 94.9474167773012         | 93.294  | 92.692  | 9.853              | 0.0205  | Passed    |
|   |       | 104.966363701477         |         |         |                    |         |           |
|   |       | 89.1183534916045         |         |         |                    |         |           |
|   |       | 86.3394254725436         |         |         |                    |         |           |
|   |       | 81.467831224572          |         |         |                    |         |           |
|   |       | 85.4325077242076         |         |         |                    |         |           |
|   |       | 84.5351163283779         |         |         |                    |         |           |
| C | ActD  | Calculated concentration | Mean    | Median  | Standard deviation | P-value | Normality |
|   | NT    | 89.1183534916045         | 94.097  | 94.959  | 5.537              | 0.446   | Passed    |
|   |       | 93.4553468356448         |         |         |                    |         |           |
|   |       | 96.9739650302275         |         |         |                    |         |           |
|   |       | 100.095177235046         |         |         |                    |         |           |
|   |       | 99.5680846696425         |         |         |                    |         |           |
|   |       | 83.6471512193183         |         |         |                    |         |           |
|   |       | 96.4633084989432         |         |         |                    |         |           |
|   | 1 h   | 93.4553468356448         | 104.005 | 107.78  | 11.236             | 0.0421  | Passed    |
|   |       | 117.274381527681         |         |         |                    |         |           |
|   |       | 108.918374684741         |         |         |                    |         |           |
|   |       | 114.823598032092         |         |         |                    |         |           |
|   |       | 98.0034023293917         |         |         |                    |         |           |
|   |       | 109.49496572516          |         |         |                    |         |           |
|   |       | 90.541180766844          |         |         |                    |         |           |
|   | 6 h   | 106.642213842394         | 97.006  | 93.488  | 8.909              | 0.446   | Passed    |
|   |       | 86.3394254725436         |         |         |                    |         |           |
|   |       | 107.774285451105         |         |         |                    |         |           |
|   |       | 90.541180766844          |         |         |                    |         |           |
|   |       | 89.5901273709785         |         |         |                    |         |           |
|   |       | 91.0204867955118         |         |         |                    |         |           |
|   |       | 104.41361988851          |         |         |                    |         |           |
|   | 24 h  | 109.49496572516          | 47.887  | 46.432  | 4.676              | <0.001  | Passed    |
|   |       | 95.9553410408844         |         |         |                    |         |           |
|   |       | 87.2559707013803         |         |         |                    |         |           |
|   |       | 45.8193749995694         |         |         |                    |         |           |
|   |       | 49.0747572682667         |         |         |                    |         |           |
|   |       | 58.1077632572565         |         |         |                    |         |           |
|   |       | 44.3906149292417         |         |         |                    |         |           |

**Figure S3 The calculated values of *eEF1α1* expression obtained from RT-qPCR measurements and the result of statistical test. A) UVB; B) NCS; C) ActD**

**A**

| UVB   | Calculated concentration | Mean   | Median | Standard deviation | P-value | Normality |
|-------|--------------------------|--------|--------|--------------------|---------|-----------|
| NT    | 89.1281096149595         | 80.287 | 80.21  | 10.178             |         | Passed    |
|       | 79.8848214043385         |        |        |                    |         |           |
|       | 97.6427609327752         |        |        |                    |         |           |
|       | 82.3517287573055         |        |        |                    |         |           |
|       | 70.8770041552326         |        |        |                    |         |           |
|       | 64.6963783845983         |        |        |                    |         |           |
|       | 80.5342998947769         |        |        |                    |         |           |
| 0.5 h | 77.17720431557           | 79.935 | 79.096 | 11.386             | 0.949   | Passed    |
|       | 75.170487167153          |        |        |                    |         |           |
|       | 83.8682906497686         |        |        |                    |         |           |
|       | 66.9661371105057         |        |        |                    |         |           |
|       | 72.4765016951278         |        |        |                    |         |           |
|       | 83.0212653628452         |        |        |                    |         |           |
|       | 92.627471082903          |        |        |                    |         |           |
| 2 h   | 97.8396828974336         | 80.925 | 80.312 | 10.404             | 0.903   | Passed    |
|       | 67.5105762788049         |        |        |                    |         |           |
|       | 89.6719028651134         |        |        |                    |         |           |
|       | 84.379992407545          |        |        |                    |         |           |
|       | 72.4765016951278         |        |        |                    |         |           |
|       | 64.5661819247402         |        |        |                    |         |           |
|       | 87.1611367349924         |        |        |                    |         |           |
| 6 h   | 96.656630683114          | 87.152 | 87.628 | 13.069             | 0.261   | Passed    |
|       | 76.2439974637425         |        |        |                    |         |           |
|       | 76.2439974637425         |        |        |                    |         |           |
|       | 68.6154647414833         |        |        |                    |         |           |
|       | 89.6719028651134         |        |        |                    |         |           |
|       | 104.399554420506         |        |        |                    |         |           |
|       | 101.890075392473         |        |        |                    |         |           |
|       | 85.5850303715745         |        |        |                    |         |           |
|       | 76.2439974637425         |        |        |                    |         |           |
|       | 95.4878836310802         |        |        |                    |         |           |
|       | 75.3220747085083         |        |        |                    |         |           |
|       |                          |        |        |                    |         |           |
|       |                          |        |        |                    |         |           |
|       |                          |        |        |                    |         |           |

**B**

| NCS | Calculated concentration | Mean   | Median | Standard deviation | P-value | Normality |
|-----|--------------------------|--------|--------|--------------------|---------|-----------|
| NT  | 57.1704088394389         | 70.403 | 71.674 | 9.706              |         | Passed    |
|     | 56.47911194612542        |        |        |                    |         |           |
|     | 66.5600374049563         |        |        |                    |         |           |
|     | 71.1659336637744         |        |        |                    |         |           |
|     | 81.0256604590892         |        |        |                    |         |           |
|     | 72.1822522434096         |        |        |                    |         |           |
|     | 79.5604999089465         |        |        |                    |         |           |
| 2 h | 79.0780244572101         | 79.365 | 85.762 | 16.493             | 0.207   | Passed    |
|     | 90.2190139361004         |        |        |                    |         |           |
|     | 86.4582107277953         |        |        |                    |         |           |
|     | 56.47911194612542        |        |        |                    |         |           |
|     | 53.7965461830841         |        |        |                    |         |           |
|     | 85.0660206087192         |        |        |                    |         |           |
|     | 73.0657443819995         |        |        |                    |         |           |
| 4 h | 93.7612074235655         | 82.844 | 84.466 | 9.919              | 0.0238  | Passed    |
|     | 96.0704798720268         |        |        |                    |         |           |
|     | 69.0341051316338         |        |        |                    |         |           |
|     | 69.0341051316338         |        |        |                    |         |           |
|     | 84.8948161878033         |        |        |                    |         |           |
|     | 84.8948161878033         |        |        |                    |         |           |
|     | 93.7612074235655         |        |        |                    |         |           |
| 8 h | 81.0256604590892         | 78.371 | 75.062 | 9.264              | 0.115   | Passed    |
|     | 96.0704798720268         |        |        |                    |         |           |
|     | 84.0374242246736         |        |        |                    |         |           |
|     | 72.0369857357549         |        |        |                    |         |           |
|     | 69.4552997532089         |        |        |                    |         |           |
|     | 72.4765016951278         |        |        |                    |         |           |
|     | 72.4765016951278         |        |        |                    |         |           |
|     | 97.2463577516927         |        |        |                    |         |           |
|     | 77.6480823726723         |        |        |                    |         |           |
|     | 85.5850303715745         |        |        |                    |         |           |
|     | 80.0459190680292         |        |        |                    |         |           |
|     |                          |        |        |                    |         |           |
|     |                          |        |        |                    |         |           |
|     |                          |        |        |                    |         |           |

**C**

| ActD | Calculated concentration | Mean    | Median | Standard deviation | P-value | Normality |
|------|--------------------------|---------|--------|--------------------|---------|-----------|
| NT   | 59.2954596799313         | 101.702 | 70.234 | 64.886             |         | Failed    |
|      | 65.7552111354986         |         |        |                    |         |           |
|      | 148.8647234458           |         |        |                    |         |           |
|      | 245.137950831289         |         |        |                    |         |           |
|      | 63.1412538102463         |         |        |                    |         |           |
|      | 70.4471876679475         |         |        |                    |         |           |
|      | 90.9525187811112         |         |        |                    |         |           |
| 1 h  | 70.019977699024          | 139.641 | 82.943 | 108.169            | 0.234   | Failed    |
|      | 83.8682906497686         |         |        |                    |         |           |
|      | 109.605454702434         |         |        |                    |         |           |
|      | 316.491187441543         |         |        |                    |         |           |
|      | 310.768180684426         |         |        |                    |         |           |
|      | 65.4882453591185         |         |        |                    |         |           |
|      | 72.1822522434096         |         |        |                    |         |           |
| 6 h  | 76.7091817848102         | 120.274 | 81.471 | 82.376             | 0.328   | Failed    |
|      | 82.0173936319233         |         |        |                    |         |           |
|      | 70.305414121776          |         |        |                    |         |           |
|      | 64.960116611233          |         |        |                    |         |           |
|      | 215.742156849635         |         |        |                    |         |           |
|      | 283.668533215911         |         |        |                    |         |           |
|      | 87.1611367349924         |         |        |                    |         |           |
| 24 h | 91.5074435896996         | 94.33   | 65.958 | 63.719             | 0.574   | Failed    |
|      | 73.0657443819995         |         |        |                    |         |           |
|      | 75.7816341407292         |         |        |                    |         |           |
|      | 65.3564547933732         |         |        |                    |         |           |
|      | 66.5600374049563         |         |        |                    |         |           |
|      | 156.287891524754         |         |        |                    |         |           |
|      | 226.500181013728         |         |        |                    |         |           |
|      | 81.0256604590892         |         |        |                    |         |           |
|      | 64.3040428107578         |         |        |                    |         |           |
|      | 46.5831222518803         |         |        |                    |         |           |
|      | 48.0216474093175         |         |        |                    |         |           |
|      |                          |         |        |                    |         |           |
|      |                          |         |        |                    |         |           |
|      |                          |         |        |                    |         |           |

**Figure S4 The calculated values of *GAPDH* expression obtained from RT-qPCR measurements and the result of statistical test. A) UVB; B) NCS; C) ActD**

|          |       |                          |        |        |                    |         |           |
|----------|-------|--------------------------|--------|--------|--------------------|---------|-----------|
| <b>A</b> | UVB   | Calculated concentration | Mean   | Median | Standard deviation | P-value | Normality |
|          | NT    | 73.9639914244113         | 79.473 | 78.817 | 4.811              |         | Passed    |
|          |       | 74.3726309487969         |        |        |                    |         |           |
|          |       | 76.4499441173747         |        |        |                    |         |           |
|          |       | 86.778411843397          |        |        |                    |         |           |
|          |       | 81.2265546361391         |        |        |                    |         |           |
|          |       | 77.2970257191267         |        |        |                    |         |           |
|          |       | 85.3558479990144         |        |        |                    |         |           |
|          |       | 80.3364101659495         |        |        |                    |         |           |
|          | 0.5 h | 73.9639914244113         | 73.109 | 74.578 | 13.464             | 0.328   | Passed    |
|          |       | 68.4732691732755         |        |        |                    |         |           |
|          |       | 43.1047772492053         |        |        |                    |         |           |
|          |       | 74.3726309487969         |        |        |                    |         |           |
|          |       | 80.3364101659495         |        |        |                    |         |           |
|          |       | 74.783528142863          |        |        |                    |         |           |
|          |       | 82.5802985510313         |        |        |                    |         |           |
|          |       | 87.2578490433059         |        |        |                    |         |           |
|          | 2 h   | 81.675318690306          | 77.729 | 81.003 | 7.33               | 0.583   | Failed    |
|          |       | 84.8868613209195         |        |        |                    |         |           |
|          |       | 69.614463354062          |        |        |                    |         |           |
|          |       | 63.3901510854431         |        |        |                    |         |           |
|          |       | 81.2265546361391         |        |        |                    |         |           |
|          |       | 80.780256310659          |        |        |                    |         |           |
|          |       | 78.585279033271          |        |        |                    |         |           |
|          |       | 81.675318690306          |        |        |                    |         |           |
|          | 6 h   | 75.6121455020422         | 75.726 | 76.24  | 4.387              | 0.126   | Passed    |
|          |       | 76.4499441173747         |        |        |                    |         |           |
|          |       | 76.0298908208207         |        |        |                    |         |           |
|          |       | 80.3364101659495         |        |        |                    |         |           |
|          |       | 79.0194504514088         |        |        |                    |         |           |
|          |       | 79.8950027285326         |        |        |                    |         |           |
|          |       | 69.614463354062          |        |        |                    |         |           |
|          |       | 68.8515733130229         |        |        |                    |         |           |
| <b>B</b> | NCS   | Calculated concentration | Mean   | Median | Standard deviation | P-value | Normality |
|          | NT    | 43.8231732240844         | 83.217 | 90.967 | 26.213             |         | Failed    |
|          |       | 43.8231732240844         |        |        |                    |         |           |
|          |       | 88.7121121558819         |        |        |                    |         |           |
|          |       | 88.7121121558819         |        |        |                    |         |           |
|          |       | 93.7369835981792         |        |        |                    |         |           |
|          |       | 94.2548658224511         |        |        |                    |         |           |
|          |       | 93.221946871547          |        |        |                    |         |           |
|          |       | 119.452271862274         |        |        |                    |         |           |
|          | 2 h   | 91.1899435360926         | 93.909 | 91.95  | 8.305              | 0.290   | Passed    |
|          |       | 87.2578490433059         |        |        |                    |         |           |
|          |       | 89.2022327486254         |        |        |                    |         |           |
|          |       | 85.827425755408          |        |        |                    |         |           |
|          |       | 92.7097400080017         |        |        |                    |         |           |
|          |       | 94.7756092652934         |        |        |                    |         |           |
|          |       | 111.810026027461         |        |        |                    |         |           |
|          |       | 98.5022664045449         |        |        |                    |         |           |
|          | 4 h   | 83.4953057806295         | 90.95  | 89.224 | 7.557              | 0.878   | Passed    |
|          |       | 87.2578490433059         |        |        |                    |         |           |
|          |       | 85.3558479990144         |        |        |                    |         |           |
|          |       | 84.4204514844753         |        |        |                    |         |           |
|          |       | 91.1899435360926         |        |        |                    |         |           |
|          |       | 106.400948510201         |        |        |                    |         |           |
|          |       | 96.3551654202706         |        |        |                    |         |           |
|          |       | 92.2003474588952         |        |        |                    |         |           |
|          | 8 h   | 84.4204514844753         | 92.272 | 90.694 | 12.102             | 0.390   | Failed    |
|          |       | 83.4953057806295         |        |        |                    |         |           |
|          |       | 120.112227046149         |        |        |                    |         |           |
|          |       | 89.6950611812525         |        |        |                    |         |           |
|          |       | 92.2003474588952         |        |        |                    |         |           |
|          |       | 88.2246845248279         |        |        |                    |         |           |
|          |       | 91.6937537610101         |        |        |                    |         |           |
|          |       | 92.7097400080017         |        |        |                    |         |           |
| <b>C</b> | ActD  | Calculated concentration | Mean   | Median | Standard deviation | P-value | Normality |
|          | NT    | 89.6950611812525         | 87.740 | 86.784 | 8.555              |         | Passed    |
|          |       | 84.4204514844753         |        |        |                    |         |           |
|          |       | 101.812958130553         |        |        |                    |         |           |
|          |       | 96.8875126910325         |        |        |                    |         |           |
|          |       | 87.7399350590183         |        |        |                    |         |           |
|          |       | 85.827425755408          |        |        |                    |         |           |
|          |       | 80.3364101659495         |        |        |                    |         |           |
|          |       | 75.1966954798828         |        |        |                    |         |           |
|          | 1 h   | 87.7399350590183         | 86.630 | 86.784 | 8.102              | 0.794   | Passed    |
|          |       | 83.0365418293297         |        |        |                    |         |           |
|          |       | 101.812958130553         |        |        |                    |         |           |
|          |       | 81.675318690306          |        |        |                    |         |           |
|          |       | 89.6950611812525         |        |        |                    |         |           |
|          |       | 89.6950611812525         |        |        |                    |         |           |
|          |       | 73.5575971649675         |        |        |                    |         |           |
|          |       | 85.827425755408          |        |        |                    |         |           |
|          | 6 h   | 68.8515733130229         | 80.354 | 81.938 | 6.513              | 0.0724  | Passed    |
|          |       | 75.1966954798828         |        |        |                    |         |           |
|          |       | 86.778411843397          |        |        |                    |         |           |
|          |       | 84.4204514844753         |        |        |                    |         |           |
|          |       | 84.4204514844753         |        |        |                    |         |           |
|          |       | 87.2578490433059         |        |        |                    |         |           |
|          |       | 76.4499441173747         |        |        |                    |         |           |
|          |       | 79.4560205989607         |        |        |                    |         |           |
|          | 24 h  | 79.8950027285326         | 65.219 | 64.045 | 11.083             | <0.001  | Passed    |
|          |       | 79.8950027285326         |        |        |                    |         |           |
|          |       | 51.1331295640502         |        |        |                    |         |           |
|          |       | 59.9920541157604         |        |        |                    |         |           |
|          |       | 57.7223620068431         |        |        |                    |         |           |
|          |       | 54.628092943594          |        |        |                    |         |           |
|          |       | 70.3858063786238         |        |        |                    |         |           |
|          |       | 68.0970436210646         |        |        |                    |         |           |

**Figure S5** The calculated values of *GUSB* expression obtained from RT-qPCR measurements and the result of statistical test. A) UVB; B) NCS; C) ActD

**A**

| UVB   | Calculated concentration | Mean   | Median | Standard deviation | P-value | Normality |
|-------|--------------------------|--------|--------|--------------------|---------|-----------|
| NT    | 71.810850556618          | 66.553 | 67.632 | 4.56               |         | Passed    |
|       | 69.1013366301874         |        |        |                    |         |           |
|       | 71.4664349001102         |        |        |                    |         |           |
|       | 68.7699162106187         |        |        |                    |         |           |
|       | 61.5709110771565         |        |        |                    |         |           |
|       | 59.533293621218          |        |        |                    |         |           |
|       | 66.4940560801979         |        |        |                    |         |           |
| 0.5 h | 63.6782690874            | 64.841 | 65.723 | 5.394              | 0.504   | Passed    |
|       | 63.9851515124667         |        |        |                    |         |           |
|       | 67.4600539007076         |        |        |                    |         |           |
|       | 57.0122701839522         |        |        |                    |         |           |
|       | 60.689243149721          |        |        |                    |         |           |
|       | 59.247762977204          |        |        |                    |         |           |
|       | 68.7699162106187         |        |        |                    |         |           |
| 2 h   | 71.123671112972          | 63.919 | 66.494 | 10.275             | 0.518   | Passed    |
|       | 70.4430674943457         |        |        |                    |         |           |
|       | 74.986251864426          |        |        |                    |         |           |
|       | 71.4664349001102         |        |        |                    |         |           |
|       | 44.4012081305882         |        |        |                    |         |           |
|       | 53.0455604252518         |        |        |                    |         |           |
|       | 70.7825512725894         |        |        |                    |         |           |
| 6 h   | 66.4940560801979         | 70.888 | 70.108 | 4.919              | 0.0889  | Passed    |
|       | 71.4664349001102         |        |        |                    |         |           |
|       | 74.2686860587312         |        |        |                    |         |           |
|       | 68.4400853333059         |        |        |                    |         |           |
|       | 70.7825512725894         |        |        |                    |         |           |
|       | 66.8145085277104         |        |        |                    |         |           |
|       | 63.6782690874            |        |        |                    |         |           |
|       | 69.4343542524364         |        |        |                    |         |           |
|       | 74.986251864426          |        |        |                    |         |           |
|       | 79.058601456943          |        |        |                    |         |           |
|       | 73.9124822529188         |        |        |                    |         |           |
|       |                          |        |        |                    |         |           |
|       |                          |        |        |                    |         |           |
|       |                          |        |        |                    |         |           |

**B**

| NCS | Calculated concentration | Mean   | Median | Standard deviation | P-value | Normality |
|-----|--------------------------|--------|--------|--------------------|---------|-----------|
| NT  | 39.3727696751905         | 58.280 | 63.379 | 11.504             |         | Failed    |
|     | 42.1140788555234         |        |        |                    |         |           |
|     | 62.4653875072842         |        |        |                    |         |           |
|     | 64.2935128851268         |        |        |                    |         |           |
|     | 55.9263560512708         |        |        |                    |         |           |
|     | 66.4940560801979         |        |        |                    |         |           |
|     | 67.4600539007076         |        |        |                    |         |           |
| 2 h | 68.1118363745647         | 67.829 | 69.611 | 6.091              | 0.050   | Passed    |
|     | 58.6808034650361         |        |        |                    |         |           |
|     | 73.9124822529188         |        |        |                    |         |           |
|     | 64.2935128851268         |        |        |                    |         |           |
|     | 60.1084896839194         |        |        |                    |         |           |
|     | 68.4400853333059         |        |        |                    |         |           |
|     | 73.2051916688447         |        |        |                    |         |           |
| 4 h | 73.2051916688447         | 66.851 | 69.273 | 9.909              | 0.105   | Passed    |
|     | 70.7825512725894         |        |        |                    |         |           |
|     | 52.5379516388585         |        |        |                    |         |           |
|     | 63.9851515124667         |        |        |                    |         |           |
|     | 68.4400853333059         |        |        |                    |         |           |
|     | 53.0455604252518         |        |        |                    |         |           |
|     | 70.1052119314408         |        |        |                    |         |           |
| 8 h | 70.4430674943457         | 68.651 | 66.336 | 5.838              | 0.0392  | Passed    |
|     | 76.8106447164485         |        |        |                    |         |           |
|     | 79.4396057726255         |        |        |                    |         |           |
|     | 63.9851515124667         |        |        |                    |         |           |
|     | 65.8577546284148         |        |        |                    |         |           |
|     | 76.4422492940054         |        |        |                    |         |           |
|     | 66.8145085277104         |        |        |                    |         |           |
|     | 71.810850556618          |        |        |                    |         |           |
|     | 63.3728585166712         |        |        |                    |         |           |
|     | 77.5527703024366         |        |        |                    |         |           |
|     | 63.3728585166712         |        |        |                    |         |           |
|     |                          |        |        |                    |         |           |
|     |                          |        |        |                    |         |           |
|     |                          |        |        |                    |         |           |

**C**

| ActD | Calculated concentration | Mean   | Median | Standard deviation | P-value | Normality |
|------|--------------------------|--------|--------|--------------------|---------|-----------|
| NT   | 46.1422119612959         | 59.735 | 61.276 | 6.941              |         | Passed    |
|      | 54.5980031309658         |        |        |                    |         |           |
|      | 57.5631087373191         |        |        |                    |         |           |
|      | 61.5709110771565         |        |        |                    |         |           |
|      | 66.4940560801979         |        |        |                    |         |           |
|      | 63.068912741045          |        |        |                    |         |           |
|      | 67.4600539007076         |        |        |                    |         |           |
| 1 h  | 60.9817206680356         | 63.544 | 64.604 | 6.778              | 0.285   | Passed    |
|      | 52.5379516388585         |        |        |                    |         |           |
|      | 64.914701017335          |        |        |                    |         |           |
|      | 59.533293621218          |        |        |                    |         |           |
|      | 57.2870273967873         |        |        |                    |         |           |
|      | 69.7689767747083         |        |        |                    |         |           |
|      | 64.2935128851268         |        |        |                    |         |           |
| 6 h  | 73.2051916688447         | 58.347 | 59.259 | 9.353              | 0.741   | Passed    |
|      | 66.8145085277104         |        |        |                    |         |           |
|      | 44.8302016994371         |        |        |                    |         |           |
|      | 47.0381487542459         |        |        |                    |         |           |
|      | 60.3981683976417         |        |        |                    |         |           |
|      | 53.5580736030799         |        |        |                    |         |           |
|      | 58.1192693575128         |        |        |                    |         |           |
| 24 h | 67.7851617472756         | 47.797 | 48.555 | 4.855              | 0.00135 | Passed    |
|      | 70.4430674943457         |        |        |                    |         |           |
|      | 64.60336033282           |        |        |                    |         |           |
|      | 47.0381487542459         |        |        |                    |         |           |
|      | 41.5110240692482         |        |        |                    |         |           |
|      | 42.5209747429929         |        |        |                    |         |           |
|      | 43.346598485875          |        |        |                    |         |           |
|      | 51.5372599631422         |        |        |                    |         |           |
|      | 53.5580736030799         |        |        |                    |         |           |
|      | 52.7911459269262         |        |        |                    |         |           |
|      | 50.0718466015884         |        |        |                    |         |           |
|      |                          |        |        |                    |         |           |
|      |                          |        |        |                    |         |           |
|      |                          |        |        |                    |         |           |

**Figure S6 The calculated values of *HPRT1* expression obtained from RT-qPCR measurements and the result of statistical test. A) UVB; B) NCS; C) ActD**

|   |       |                          |         |         |                    |         |           |
|---|-------|--------------------------|---------|---------|--------------------|---------|-----------|
| A | UVB   | Calculated concentration | Mean    | Median  | Standard deviation | P-value | Normality |
|   | NT    | 126.456780110011         | 110.666 | 118.018 | 27.513             |         | Passed    |
|   |       | 112.675955964875         |         |         |                    |         |           |
|   |       | 131.415242905504         |         |         |                    |         |           |
|   |       | 141.242382486956         |         |         |                    |         |           |
|   |       | 122.271840532764         |         |         |                    |         |           |
|   |       | 113.764603380294         |         |         |                    |         |           |
|   |       | 72.0529286399155         |         |         |                    |         |           |
|   |       | 65.4474275458265         |         |         |                    |         |           |
|   | 0.5 h | 105.341600307972         | 100.941 | 90.471  | 24.99              | 0.471   | Failed    |
|   |       | 141.242382486956         |         |         |                    |         |           |
|   |       | 85.2569882600592         |         |         |                    |         |           |
|   |       | 83.6330962774608         |         |         |                    |         |           |
|   |       | 136.568130652139         |         |         |                    |         |           |
|   |       | 80.0915318347463         |         |         |                    |         |           |
|   |       | 79.7074007834669         |         |         |                    |         |           |
|   |       | 95.6843376647717         |         |         |                    |         |           |
|   | 2 h   | 143.984865818707         | 114.477 | 110.29  | 17.842             | 0.747   | Passed    |
|   |       | 133.324388560198         |         |         |                    |         |           |
|   |       | 107.387003238011         |         |         |                    |         |           |
|   |       | 107.904529616266         |         |         |                    |         |           |
|   |       | 122.271840532764         |         |         |                    |         |           |
|   |       | 112.675955964875         |         |         |                    |         |           |
|   |       | 97.0743996806848         |         |         |                    |         |           |
|   |       | 91.1929629586363         |         |         |                    |         |           |
|   | 6 h   | 141.923066894384         | 110.299 | 110.249 | 23.16              | 0.977   | Passed    |
|   |       | 134.612536060482         |         |         |                    |         |           |
|   |       | 102.839545243443         |         |         |                    |         |           |
|   |       | 95.2254211679069         |         |         |                    |         |           |
|   |       | 124.645975538838         |         |         |                    |         |           |
|   |       | 117.658369836262         |         |         |                    |         |           |
|   |       | 75.6016312009135         |         |         |                    |         |           |
|   |       | 89.887120487868          |         |         |                    |         |           |
| B | NCS   | Calculated concentration | Mean    | Median  | Standard deviation | P-value | Normality |
|   | NT    | 87.3312650254566         | 81.676  | 83.649  | 9.589              |         | Passed    |
|   |       | 80.4775141151853         |         |         |                    |         |           |
|   |       | 85.2569882600592         |         |         |                    |         |           |
|   |       | 82.0401346059719         |         |         |                    |         |           |
|   |       | 64.2008487604115         |         |         |                    |         |           |
|   |       | 72.7490863415785         |         |         |                    |         |           |
|   |       | 95.6843376647717         |         |         |                    |         |           |
|   |       | 85.6678642415533         |         |         |                    |         |           |
|   | 2 h   | 130.784955604775         | 81.392  | 73.431  | 28.702             | 0.645   | Passed    |
|   |       | 114.863769039689         |         |         |                    |         |           |
|   |       | 56.9301002747723         |         |         |                    |         |           |
|   |       | 64.8211415946032         |         |         |                    |         |           |
|   |       | 53.2243797470625         |         |         |                    |         |           |
|   |       | 59.4474902439056         |         |         |                    |         |           |
|   |       | 89.0269638267365         |         |         |                    |         |           |
|   |       | 82.0401346059719         |         |         |                    |         |           |
|   | 4 h   | 96.6088162369995         | 93.705  | 91.637  | 13.096             | 0.0547  | Passed    |
|   |       | 117.094062571041         |         |         |                    |         |           |
|   |       | 90.7555877714209         |         |         |                    |         |           |
|   |       | 92.517776162355          |         |         |                    |         |           |
|   |       | 104.333555120771         |         |         |                    |         |           |
|   |       | 90.3203103014874         |         |         |                    |         |           |
|   |       | 85.2569882600592         |         |         |                    |         |           |
|   |       | 72.7490863415785         |         |         |                    |         |           |
|   | 8 h   | 77.8142046935308         | 84.258  | 78.953  | 16.791             | 0.711   | Passed    |
|   |       | 66.3982203849786         |         |         |                    |         |           |
|   |       | 80.0915318347463         |         |         |                    |         |           |
|   |       | 95.6843376647717         |         |         |                    |         |           |
|   |       | 107.387003238011         |         |         |                    |         |           |
|   |       | 106.359384980214         |         |         |                    |         |           |
|   |       | 74.8781766468359         |         |         |                    |         |           |
|   |       | 65.4474275458265         |         |         |                    |         |           |
| C | ActD  | Calculated concentration | Mean    | Median  | Standard deviation | P-value | Normality |
|   | NT    | 109.999696581609         | 90.910  | 90.54   | 16.705             |         | Passed    |
|   |       | 108.424550091051         |         |         |                    |         |           |
|   |       | 89.887120487868          |         |         |                    |         |           |
|   |       | 106.871958994224         |         |         |                    |         |           |
|   |       | 65.1335318246335         |         |         |                    |         |           |
|   |       | 81.2550680927892         |         |         |                    |         |           |
|   |       | 74.5190496323522         |         |         |                    |         |           |
|   |       | 91.1929629586363         |         |         |                    |         |           |
|   | 1 h   | 139.219854698187         | 94.225  | 86.117  | 22.356             | 0.742   | Passed    |
|   |       | 109.472121466983         |         |         |                    |         |           |
|   |       | 79.3251120825731         |         |         |                    |         |           |
|   |       | 102.839545243443         |         |         |                    |         |           |
|   |       | 82.0401346059719         |         |         |                    |         |           |
|   |       | 68.6708003930744         |         |         |                    |         |           |
|   |       | 83.6330962774608         |         |         |                    |         |           |
|   |       | 88.5999770976333         |         |         |                    |         |           |
|   | 6 h   | 100.396918548407         | 101.835 | 103.584 | 17.867             | 0.227   | Passed    |
|   |       | 92.0740469714511         |         |         |                    |         |           |
|   |       | 127.678574464006         |         |         |                    |         |           |
|   |       | 111.59772614122          |         |         |                    |         |           |
|   |       | 103.833155674111         |         |         |                    |         |           |
|   |       | 65.7628360135422         |         |         |                    |         |           |
|   |       | 103.335156218575         |         |         |                    |         |           |
|   |       | 109.999696581609         |         |         |                    |         |           |
|   | 24 h  | 95.2254211679069         | 86.767  | 86.147  | 13.344             | 0.592   | Passed    |
|   |       | 96.1454658016432         |         |         |                    |         |           |
|   |       | 105.849269348387         |         |         |                    |         |           |
|   |       | 98.012308690737          |         |         |                    |         |           |
|   |       | 71.7073519404547         |         |         |                    |         |           |
|   |       | 74.1616450451272         |         |         |                    |         |           |
|   |       | 77.0695773638921         |         |         |                    |         |           |
|   |       | 75.9659754623772         |         |         |                    |         |           |

**Figure S7 The calculated values of *PPIA* expression obtained from RT-qPCR measurements and the result of statistical test. A) UVB; B) NCS; C) ActD**

|   |       |                          |         |        |                    |         |           |
|---|-------|--------------------------|---------|--------|--------------------|---------|-----------|
| A | UVB   | Calculated concentration | Mean    | Median | Standard deviation | P-value | Normality |
|   | NT    | 82.8023035887828         | 87.171  | 84.92  | 20.831             |         | Passed    |
|   |       | 94.2670399650554         |         |        |                    |         |           |
|   |       | 114.508057333386         |         |        |                    |         |           |
|   |       | 117.986517226557         |         |        |                    |         |           |
|   |       | 87.0368124089072         |         |        |                    |         |           |
|   |       | 70.9405725197712         |         |        |                    |         |           |
|   |       | 67.826621775642          |         |        |                    |         |           |
|   |       | 62.0027828507649         |         |        |                    |         |           |
|   | 0.5 h | 143.320580386881         | 100.234 | 93.377 | 30.174             | 0.331   | Passed    |
|   |       | 103.121417646825         |         |        |                    |         |           |
|   |       | 141.898056297716         |         |        |                    |         |           |
|   |       | 111.132148846195         |         |        |                    |         |           |
|   |       | 69.8870198736464         |         |        |                    |         |           |
|   |       | 83.6323943917621         |         |        |                    |         |           |
|   |       | 82.3903529578754         |         |        |                    |         |           |
|   |       | 66.4868815427891         |         |        |                    |         |           |
|   | 2 h   | 102.608377173089         | 92.083  | 93.600 | 13.934             | 0.588   | Passed    |
|   |       | 99.583293179681          |         |        |                    |         |           |
|   |       | 113.938367066111         |         |        |                    |         |           |
|   |       | 96.1665627452279         |         |        |                    |         |           |
|   |       | 91.0327116542487         |         |        |                    |         |           |
|   |       | 72.3700566065712         |         |        |                    |         |           |
|   |       | 84.8931597037258         |         |        |                    |         |           |
|   |       | 76.0710604401763         |         |        |                    |         |           |
|   | 6 h   | 134.322829832965         | 93.739  | 89.724 | 23.661             | 0.565   | Passed    |
|   |       | 99.0878552670241         |         |        |                    |         |           |
|   |       | 103.63702331587          |         |        |                    |         |           |
|   |       | 116.815445615638         |         |        |                    |         |           |
|   |       | 80.3611391331635         |         |        |                    |         |           |
|   |       | 72.7319058936244         |         |        |                    |         |           |
|   |       | 72.3700566065712         |         |        |                    |         |           |
|   |       | 70.5876353146473         |         |        |                    |         |           |

  

|   |     |                          |         |        |                    |         |           |
|---|-----|--------------------------|---------|--------|--------------------|---------|-----------|
| B | NCS | Calculated concentration | Mean    | Median | Standard deviation | P-value | Normality |
|   | NT  | 105.725355427823         | 100.944 | 99.857 | 17.929             |         | Passed    |
|   |     | 72.0100075597965         |         |        |                    |         |           |
|   |     | 129.068833858837         |         |        |                    |         |           |
|   |     | 119.765173801924         |         |        |                    |         |           |
|   |     | 102.097889132529         |         |        |                    |         |           |
|   |     | 93.7980510009292         |         |        |                    |         |           |
|   |     | 97.6162816892055         |         |        |                    |         |           |
|   |     | 87.4719952731238         |         |        |                    |         |           |
|   | 2 h | 111.687808060991         | 95.911  | 92.189 | 18.225             | 0.586   | Passed    |
|   |     | 131.669628263924         |         |        |                    |         |           |
|   |     | 96.1665627452279         |         |        |                    |         |           |
|   |     | 84.0505552127457         |         |        |                    |         |           |
|   |     | 86.6037946276378         |         |        |                    |         |           |
|   |     | 72.7319058936244         |         |        |                    |         |           |
|   |     | 93.7980510009292         |         |        |                    |         |           |
|   |     | 90.5798138316783         |         |        |                    |         |           |
|   | 4 h | 97.1306298765651         | 91.349  | 91.946 | 9.249              | 0.200   | Passed    |
|   |     | 90.5798138316783         |         |        |                    |         |           |
|   |     | 92.4050373653845         |         |        |                    |         |           |
|   |     | 97.6162816892055         |         |        |                    |         |           |
|   |     | 74.1974861445957         |         |        |                    |         |           |
|   |     | 104.155207006164         |         |        |                    |         |           |
|   |     | 83.2163139671753         |         |        |                    |         |           |
|   |     | 91.4878739596992         |         |        |                    |         |           |
|   | 8 h | 87.9093540456724         | 93.445  | 93.333 | 7.972              | 0.298   | Passed    |
|   |     | 108.93701945489          |         |        |                    |         |           |
|   |     | 97.1306298765651         |         |        |                    |         |           |
|   |     | 84.4708068320791         |         |        |                    |         |           |
|   |     | 92.8670612805042         |         |        |                    |         |           |
|   |     | 93.7980510009292         |         |        |                    |         |           |
|   |     | 85.3176243339179         |         |        |                    |         |           |
|   |     | 97.1306298765651         |         |        |                    |         |           |

  

|   |      |                          |        |        |                    |         |           |
|---|------|--------------------------|--------|--------|--------------------|---------|-----------|
| C | ActD | Calculated concentration | Mean   | Median | Standard deviation | P-value | Normality |
|   | NT   | 82.3903529578754         | 65.078 | 63.331 | 17.702             |         | Passed    |
|   |      | 66.4868815427891         |        |        |                    |         |           |
|   |      | 87.9093540456724         |        |        |                    |         |           |
|   |      | 82.3903529578754         |        |        |                    |         |           |
|   |      | 60.1748265852429         |        |        |                    |         |           |
|   |      | 47.8383597184801         |        |        |                    |         |           |
|   |      | 52.856377596673          |        |        |                    |         |           |
|   |      | 40.5785419814553         |        |        |                    |         |           |
|   | 1 h  | 84.0505552127457         | 70.344 | 70.428 | 14.757             | 0.529   | Passed    |
|   |      | 84.0505552127457         |        |        |                    |         |           |
|   |      | 87.4719952731238         |        |        |                    |         |           |
|   |      | 77.6039261403358         |        |        |                    |         |           |
|   |      | 63.2521665006893         |        |        |                    |         |           |
|   |      | 62.9374799670196         |        |        |                    |         |           |
|   |      | 50.7889167231551         |        |        |                    |         |           |
|   |      | 52.5934112641593         |        |        |                    |         |           |
|   | 6 h  | 24.0359105138773         | 27.587 | 26.527 | 3.685              | <0.001  | Passed    |
|   |      | 28.477802644914          |        |        |                    |         |           |
|   |      | 32.0990231066431         |        |        |                    |         |           |
|   |      | 33.7405667663159         |        |        |                    |         |           |
|   |      | 24.6428456871515         |        |        |                    |         |           |
|   |      | 25.1394099875513         |        |        |                    |         |           |
|   |      | 24.6428456871515         |        |        |                    |         |           |
|   |      | 27.9152969952468         |        |        |                    |         |           |
|   | 24 h | 21.9721003523066         | 14.675 | 14.030 | 3.433              | <0.001  | Passed    |
|   |      | 16.617758704166          |        |        |                    |         |           |
|   |      | 13.3433842608723         |        |        |                    |         |           |
|   |      | 14.3799319251978         |        |        |                    |         |           |
|   |      | 13.6803204977484         |        |        |                    |         |           |
|   |      | 14.4518313869226         |        |        |                    |         |           |
|   |      | 10.4503120372559         |        |        |                    |         |           |
|   |      | 12.5056787282804         |        |        |                    |         |           |

**Figure S8** The calculated values of *TBP* expression obtained from RT-qPCR measurements and the result of statistical test. A) UVB; B) NCS; C) ActD
